# Supplementary material
Source: PubMed Central journal article supplement (PMC3280561)
Supplement: emboj2011467s1.pdf [file emboj2011467s1.pdf]

## SUPPLEMENTARY INFORMATION

### Sharma *et al.*, “CSP $\alpha$ Knockout Causes Neurodegeneration by Impairing SNAP-25 Function”

#### ABBREVIATIONS LIST

|                      |                                                                  |
|----------------------|------------------------------------------------------------------|
| Amph                 | Amphiphysin                                                      |
| AP180                | Assembly protein-180                                             |
| Casp-3 <sup>CL</sup> | Cleaved caspase-3                                                |
| Clath                | Clathrin (light chain)                                           |
| Cpx                  | Complexin                                                        |
| CSP $\alpha$         | Cysteine string protein-alpha                                    |
| DAPI                 | 4',6-Diamidino-2-Phenylindole                                    |
| DIV                  | Days <i>in vitro</i>                                             |
| Dyn-1                | Dynamin-1                                                        |
| GABAR                | GABA receptor                                                    |
| GDI                  | Guanine-nucleotide dissociation inhibitor                        |
| GFAP                 | Glial fibrillary acidic protein                                  |
| GFP                  | Green fluorescent protein                                        |
| GlyR                 | Glycine receptor                                                 |
| Hsc70                | Heat shock cognate 70                                            |
| MAP2                 | Microtubule-associated protein 2                                 |
| NSF                  | N-ethylmaleimide sensitive factor                                |
| KD                   | Knockdown                                                        |
| KO                   | Knockout                                                         |
| PSD-95               | Postsynaptic density protein of 95 kDa                           |
| SGT                  | Small glutamine-rich tetratricopeptide repeat-containing protein |
| shRNA                | Small hairpin RNA                                                |
| SNAP                 | Soluble NSF attachment protein                                   |
| SNAP-25              | Synaptosome-associated protein of 25 kDa                         |
| SNARE                | Soluble NSF attachment protein receptor                          |
| Syb-2                | Synaptobrevin-2                                                  |
| Syj-1                | Synaptojanin-1                                                   |
| $\alpha$ -Syn        | $\alpha$ -Synuclein                                              |
| Synt-1               | Syntaxin-1                                                       |
| Syp                  | Synaptophysin                                                    |
| Syt1                 | Synaptotagmin-1                                                  |
| tau                  | Microtubule binding protein tau                                  |
| VAMP2                | vesicle-associated membrane protein-2                            |
| vGaT                 | Vesicular GABA transporter                                       |
| vGluT1               | Vesicular glutamate transporter-1                                |
| WT                   | Wild-type                                                        |

## SUPPLEMENTARY FIGURES

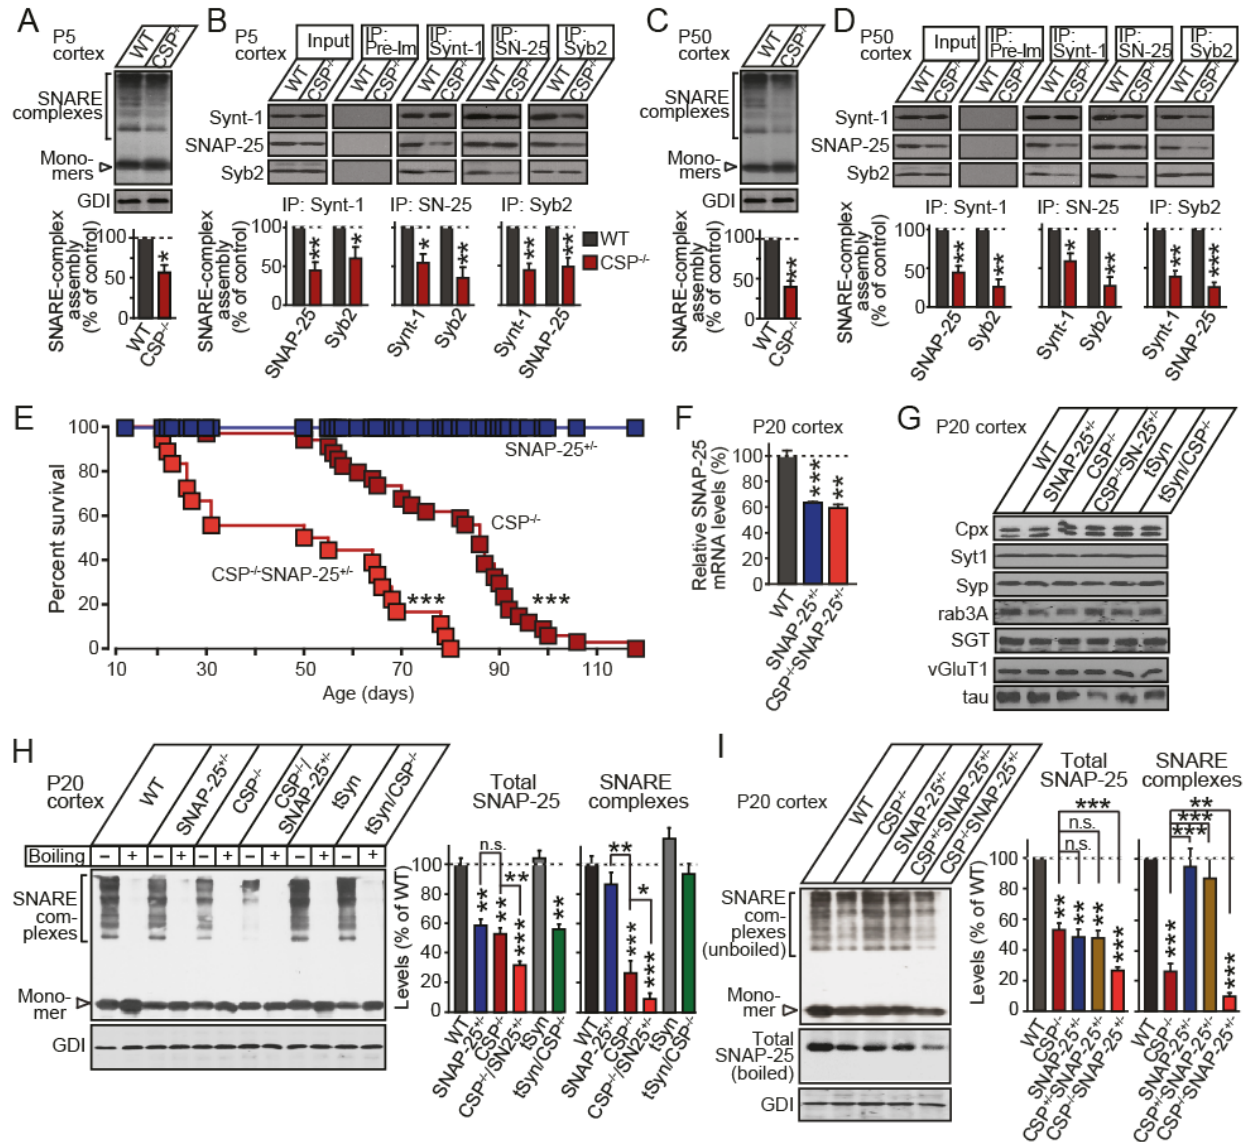

**Figure S1. Reduction in SNAP-25 levels accelerates mortality of CSP $\alpha$  KO mice and decreases SNARE-complex assembly.**

**A-D.** SNARE-complex levels in brains from wild-type (WT) and CSP $\alpha$  KO (CSP $\alpha$  $^{-/-}$ ) mice at 5 days (P5; A and B) and 50 days of age (P50; C and D). SNARE-complex levels were measured as high-molecular mass bands immunoreactive to SNAP-25 in unboiled samples, and are shown as percent of WT levels (A and C; n = 3 mice). Independently, SNARE-complex levels were measured by co-immunoprecipitation of SNARE proteins (B and D). Recovered protein (relative to the input) was first normalized to the immunoprecipitated protein, and then to WT (n = 3 mice).

**E.** Survival of mice with the indicated genotypes as a function of age. Different from Fig. 1C which contains only littermates, this analysis includes non-littermate animals also.

CSP $\alpha$  KO mice with a heterozygous SNAP-25 KO (CSP $^{-/-}$ SNAP-25 $^{+/-}$ ) perish significantly earlier than CSP $\alpha$  KO mice (CSP $^{-/-}$ ) (n=18-34 mice; \*\*\* = p<0.001 by Mantel-Cox test).

**F.** Measurements of SNAP-25 mRNA levels in the brains from WT, heterozygous SNAP-25 KO (SNAP-25 $^{+/-}$ ), and compound homozygous CSP $\alpha$  KO/heterozygous SNAP-25 KO mice (CSP $^{-/-}$ SNAP-25 $^{+/-}$ ) by quantitative RT-PCR. mRNA was isolated from the brains of littermate mice, followed by cDNA preparation. SNAP-25 mRNA levels were normalized to BiP (Grp78) mRNA levels, and then expressed as relative to WT brains (n = 3 mice).

**G.** Analysis of protein levels in brains from six different genotypes of mice at P20: WT, SNAP-25 $^{+/-}$ , CSP $^{-/-}$ , CSP $^{-/-}$ SNAP-25 $^{+/-}$ , transgenic  $\alpha$ -synuclein (tSyn), and tSyn/CSP $^{-/-}$ .

**H-I.** Analysis of SNARE complexes in mouse brains of the indicated genotypes at P20. Representative SNAP-25 and GDI immunoblots, performed on unboiled and boiled brain lysates. Total SNAP-25 levels were quantitated from boiled samples, and normalized to GDI (control). SNARE complexes were measured as high-molecular mass bands immunoreactive to SNAP-25 in the unboiled samples, and are shown as percent of WT levels (n = 4 mice; see also Fig. 1E).

Protein levels were measured by quantitative immunoblotting using  $^{125}$ I-labeled secondary antibody. Data are shown as means  $\pm$  SEMs, \*\* = p<0.01; \*\*\* = p<0.001 (assessed by Student's t-test in all experiments except for those shown in panel E which are assessed by the Mantel-Cox test, in each case, each test sample was compared to the control analyzed in the same experiment).

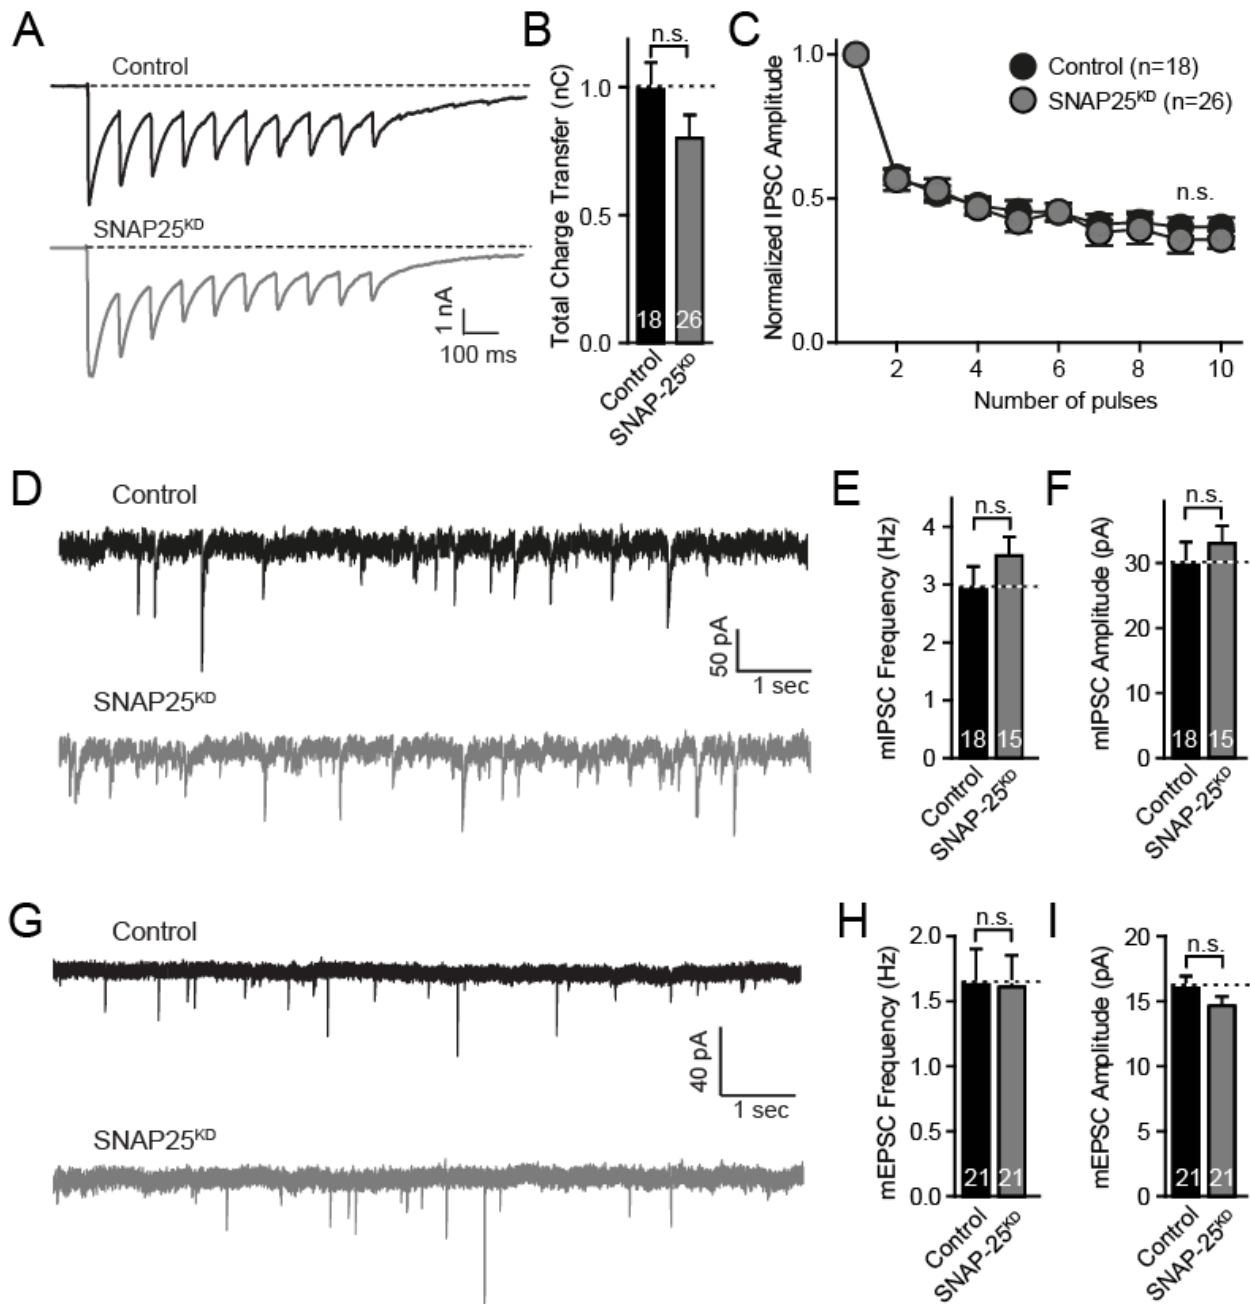

**Figure S2. Effect of the SNAP-25 knockdown on synaptic neurotransmitter release in wild-type neurons.**

Cultured cortical neurons from wild-type (WT) mice were infected with lentiviruses expressing the SNAP-25 shRNA and mCherry (SNAP-25<sup>KD</sup>) or mCherry alone (control) on 5 days *in vitro* (DIV5), and used for electrophysiological recordings at 14 days *in vitro* (DIV14).

**A-C.** Inhibitory postsynaptic currents (IPSC) were evoked by stimulus trains composed of 10 electric pulses delivered at 10 Hz. Representative traces (A), and summary

graphs of the total charge transfer (B) and of the normalized amplitudes of individual synchronous IPSCs (C) are shown. In C, the amplitudes of individual IPSCs were normalized to the amplitude of the first IPSC in the train, and plotted as a function of stimulus number; note that B depicts non-normalized data.

**D-I.** Effect of the SNAP-25 knockdown on spontaneous 'mini' release in WT neurons. Miniature inhibitory (mIPSCs; D-F) and excitatory postsynaptic currents (mEPSCs; G-I) were measured in control and SNAP-25<sup>KD</sup> neurons. Representative traces (D and G), and summary graphs of the frequency (E and H) and average amplitudes (F and I) of mIPSCs (D-F) and mEPSCs (G-I) are shown.

Data shown are means  $\pm$  SEMs; n = 3 independent cultures; numbers in panels (B-I) indicate the number of neurons analyzed. n.s. = not significant ( $p > 0.05$ ; using Student's t-test or two-way repeated-measures ANOVA in panel B, in each case comparing each test sample to the control analyzed in the same experiment).

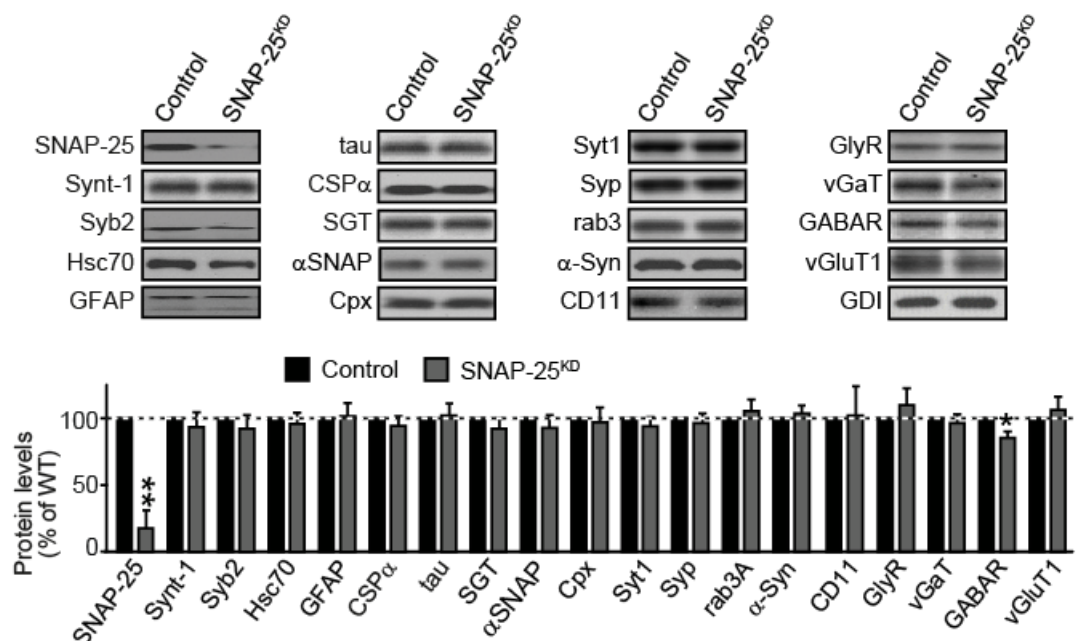

**Figure S3. SNAP-25 knockdown reduces SNARE-complex assembly.**

Effect of SNAP-25 knockdown (SNAP-25<sup>KD</sup>) on protein levels in neurons. Cultured cortical neurons from wild-type (WT) mice were infected with lentiviruses expressing SNAP-25 shRNA/mCherry or mCherry alone at 5 days *in vitro* (DIV5). On DIV14, levels of indicated proteins were measured by immunoblotting and normalized to GDI (top, representative immunoblots; bottom, protein levels).

Protein levels were determined using phosphorimager analysis with <sup>125</sup>I-labeled secondary antibody (n = 3 cultures). Data are shown as means  $\pm$  SEMs, \* = p<0.05, \*\* = p<0.01 (assessed by Student's t-test, comparing each test sample to the control analyzed in the same experiment).

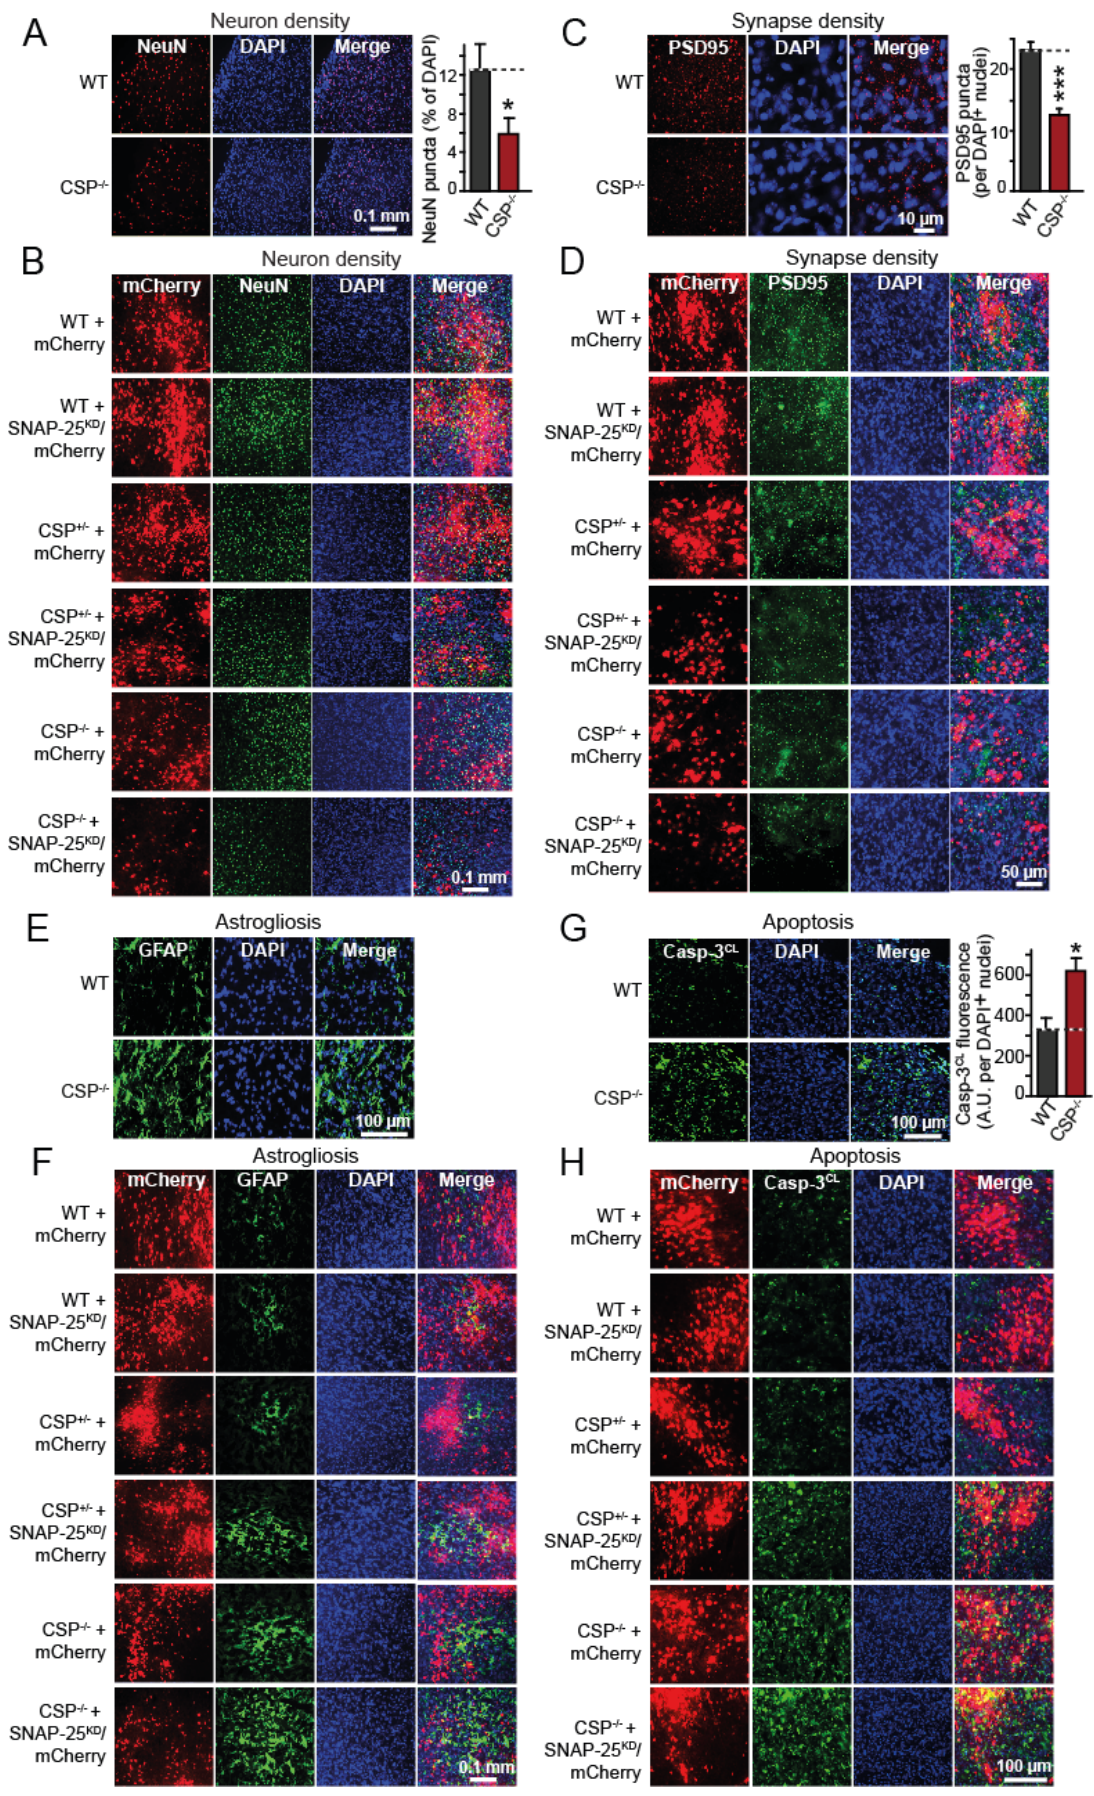

**Figure S4. SNAP-25 knockdown aggravates neurodegeneration.**

**A,C,E & G.** Changes in neuron density (A), synapse density (C), astrogliosis (E), and caspase-3 cleavage as a measure of apoptosis (G) in CSP $\alpha$  KO (CSP $^{-/-}$ ) mouse cortex. Representative images are shown of fixed brain sections from 50 day old (P50) wild-type (WT) and CSP $^{-/-}$  mice, immunostained for the neuronal marker NeuN (red; A), the synaptic marker PSD95 (red, C), the astroglial marker glial fibrillary acidic protein (GFAP; green, E), and the apoptosis marker cleaved caspase-3 (Casp-3 $^{CL}$ ; green, G). Sections are counterstained with the general nuclear stain DAPI (blue). NeuN-positive puncta (A), PSD95-positive puncta (C) and Casp-3 $^{CL}$ -positive pixels (G) were quantitated as a function of DAPI puncta in the same image.

**B,D,F & H.** Effect of the SNAP-25 knockdown on neuron and synapse density in WT, CSP $\alpha$  $^{-/+}$  and CSP $^{-/-}$  mouse brains. Stereotactic injection of lentiviruses at P1 in WT, CSP $\alpha$  $^{-/+}$  and CSP $^{-/-}$  mouse cortex were used to express mCherry as control or the SNAP-25 shRNA with mCherry (SNAP-25 $^{KD}$ /mCherry). At P50, neuron density (B), synapse density (D), astrogliosis (F), and apoptosis (H) were visualized and quantitated in the infected areas as described above. See Fig. 4 for quantitations.

Data are shown as means  $\pm$  SEMs, \* =  $p < 0.05$ ; \*\*\* =  $p < 0.001$  (using Student's t-test, comparing each test sample to the control analyzed in the same experiment).



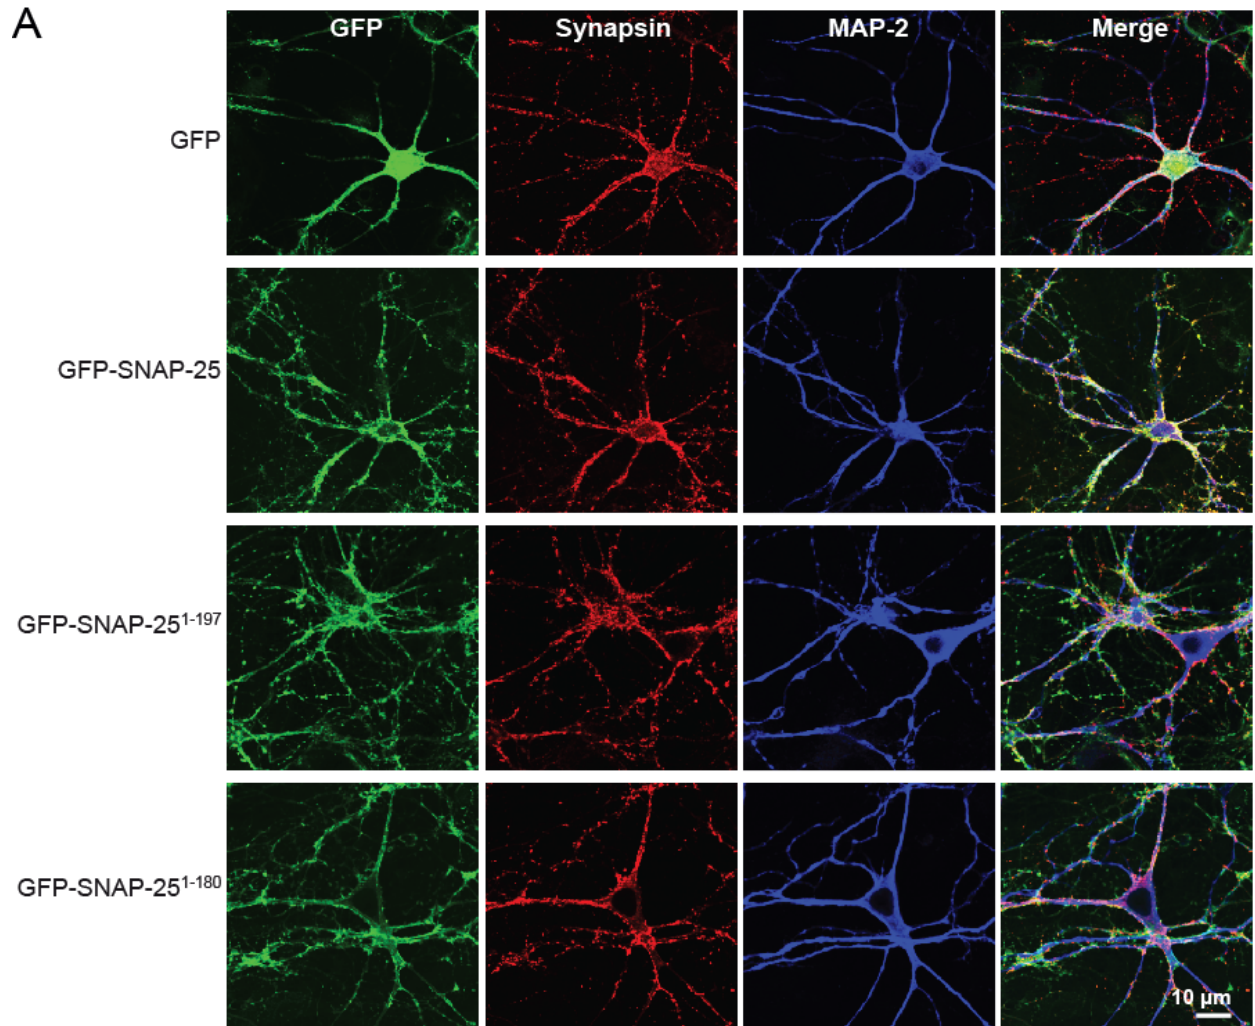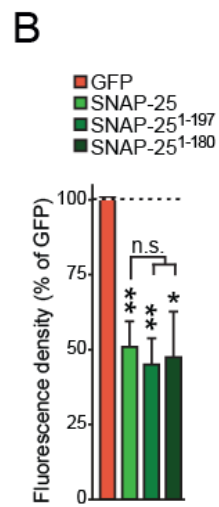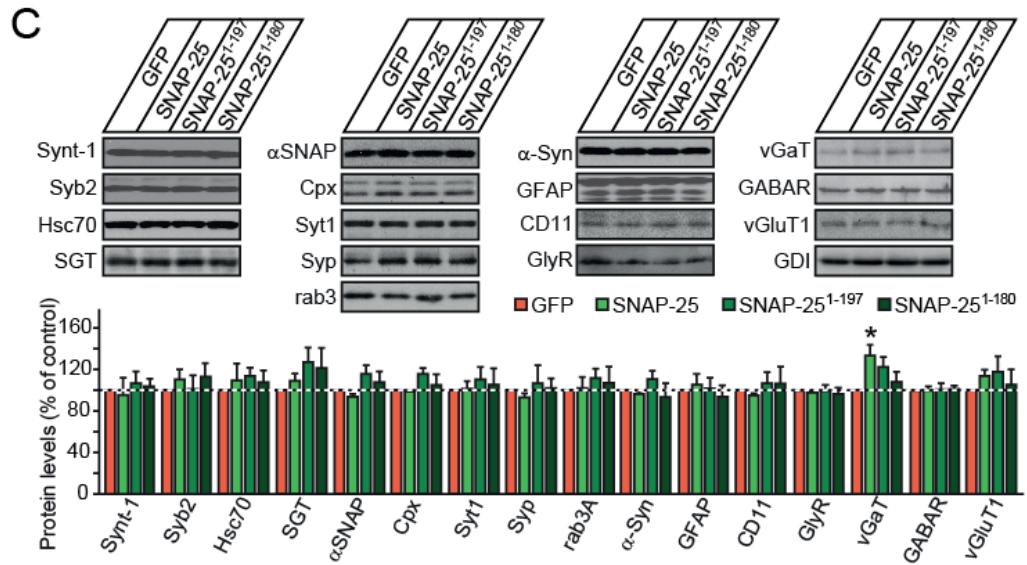

**Figure S5. SNAP-25 overexpression increases SNARE-complex assembly in CSP $\alpha$  KO neurons.**

**A.** Localization of GFP-tagged wild-type (GFP-SNAP-25) and truncated SNAP-25 (GFP-SNAP-25<sup>1-197</sup> and GFP-SNAP-25<sup>1-180</sup>) in CSP $\alpha$  KO (CSP<sup>-/-</sup>) neurons. Cultured cortical neurons from newborn CSP<sup>-/-</sup> mice were infected with lentiviruses expressing GFP alone or the indicated GFP-tagged versions of SNAP-25 at 7 days *in vitro* (DIV7), and analyzed by immunofluorescence at DIV14 (green, GFP; red, synapsin; blue, MAP2).

**B.** CSP<sup>-/-</sup> neurons were infected with lentiviruses expressing GFP, GFP-SNAP-25, GFP-SNAP-25<sup>1-197</sup> and GFP-SNAP-25<sup>1-180</sup> as in (A), and the GFP fluorescence density was quantitated as a way to measure the expression levels of the GFP-SNAP-25 fusion proteins per cell. To calculate the fluorescence density in each image, the total GFP positive pixel count was normalized to the total fluorescent area, and plotted as percent of GFP alone.

**C.** Effect of SNAP-25 overexpression in CSP<sup>-/-</sup> neurons on the levels of selected neuronal proteins. Cultured cortical neurons from CSP<sup>-/-</sup> mice were infected with the indicated lentiviruses as described above. At DIV14, the levels of syntaxin-1 (Synt-1), synaptobrevin-2 (Syb2), Hsc70, SGT,  $\alpha$ SNAP, complexin (Cpx), synaptotagmin-1 (Syt1), synaptophysin (Syp), rab3A,  $\alpha$ -synuclein ( $\alpha$ -Syn), GFAP, CD11, glycine receptor (GlyR), vesicular GABA transporter (vGaT), GABA receptor (GABAR) and vesicular glutamate transporter 1 (vGluT1) were measured by immunoblotting (top, representative blots; bottom, protein quantitations with <sup>125</sup>I-labeled secondary antibodies; values are normalized to GDI as an internal standard).

Data are shown as means  $\pm$  SEMs; n = 3 cultures (10 images were quantitated from each culture in B); n.s. = not significant (p>0.05); \* = p<0.05; \*\* = p<0.01 (using Student's t-test, comparing each test sample to the control analyzed in the same experiment).

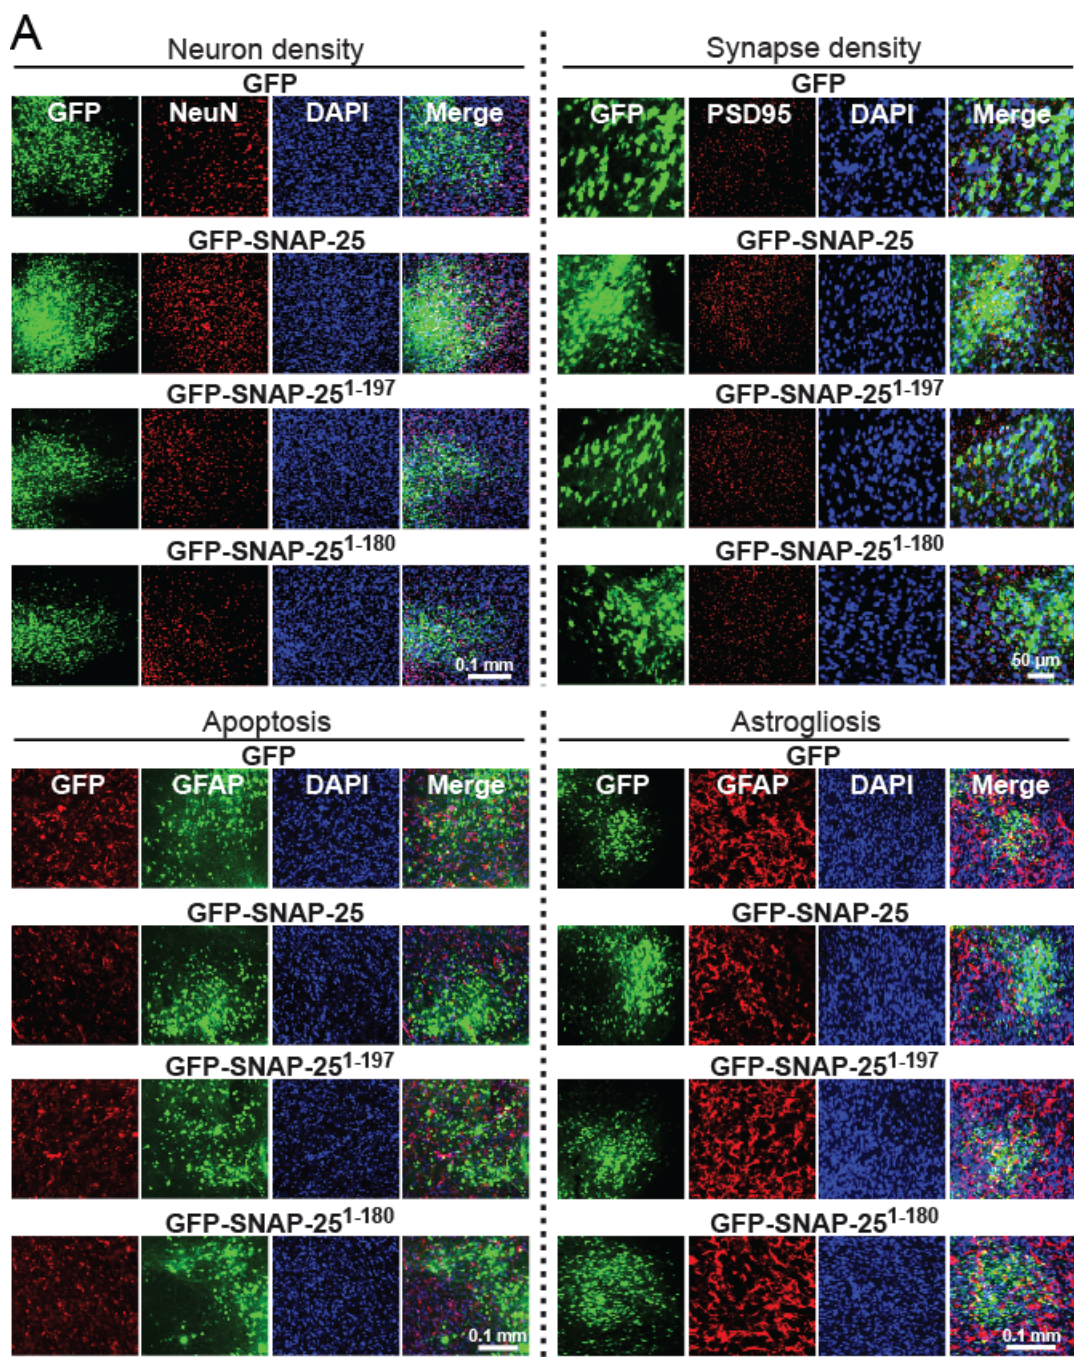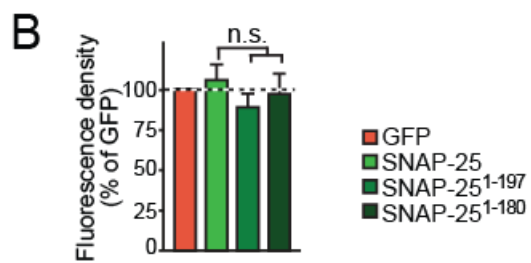

**Figure S6. SNAP-25 overexpression rescues neurodegeneration in CSP $\alpha$  KO mice.**

**A.** Lentiviruses expressing GFP or GFP-SNAP-25 wild-type and truncated versions (GFP-SNAP-25<sup>1-197</sup> and GFP-SNAP-25<sup>1-180</sup>) were injected into the cortices of neonatal littermate CSP $\alpha$  KO (CSP<sup>-/-</sup>) mice. Brain sections were immunostained for the indicated proteins at P50. For quantitations of neuron loss (top left), synapse density (top right), and apoptosis (bottom left), see Fig. 6. Representative images from glial fibrillary acidic protein (GFAP; bottom right) stained sections are shown as an indication of astrogliosis in the infected cortical areas.

**B.** In CSP<sup>-/-</sup> cortices injected with lentiviruses expressing GFP, GFP-SNAP-25, GFP-SNAP-25<sup>1-197</sup> and GFP-SNAP-25<sup>1-180</sup> as in (A), GFP fluorescence density was quantitated as a measure of the GFP-SNAP-25 fusion protein expression levels per cell. To calculate the fluorescence density in each image, the total GFP positive pixel count was normalized to the total fluorescent area, and plotted as percent of GFP alone.

Data are shown as means  $\pm$  SEMs; n = 3 brains (10 images from each brain); n.s. = not significant ( $p > 0.05$ , using Student's t-test, comparing each test sample to the control analyzed in the same experiment).
