# Supplementary material
Source: PubMed Central journal article supplement (PMC3280561)
Supplement: emboj2011467s2.pdf [file emboj2011467s2.pdf]

**D**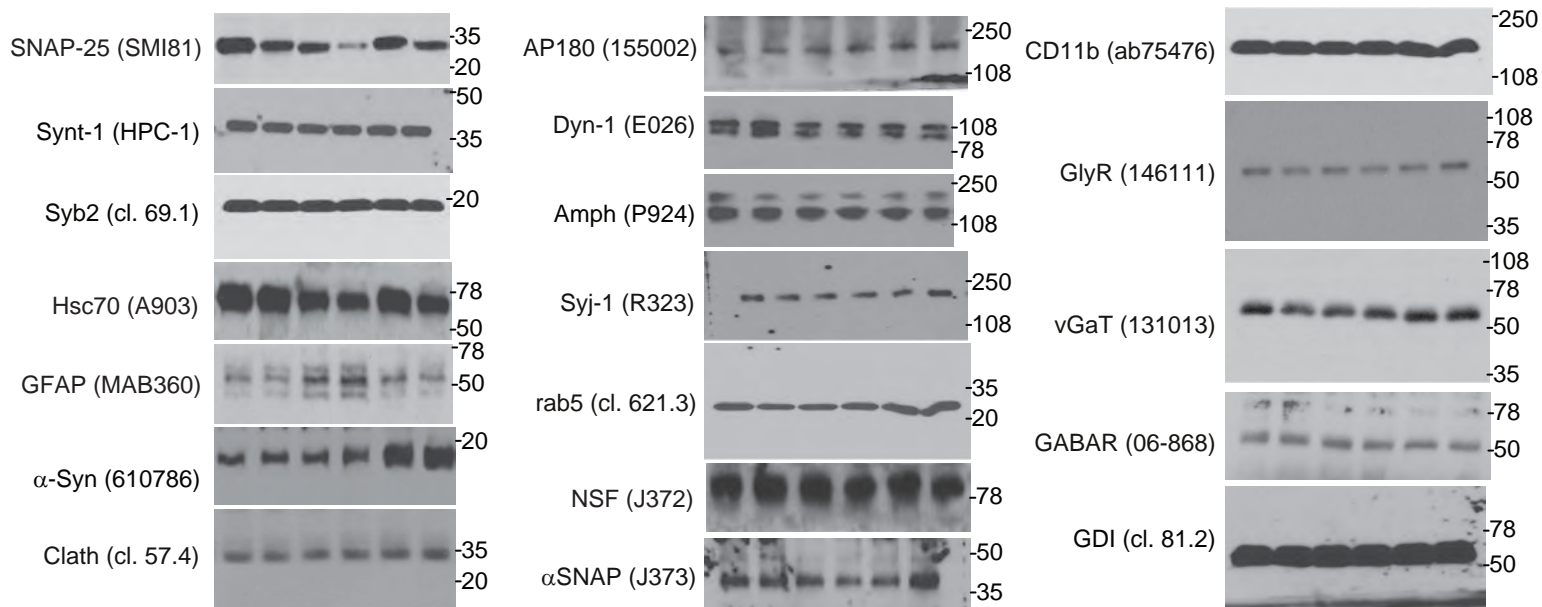**E**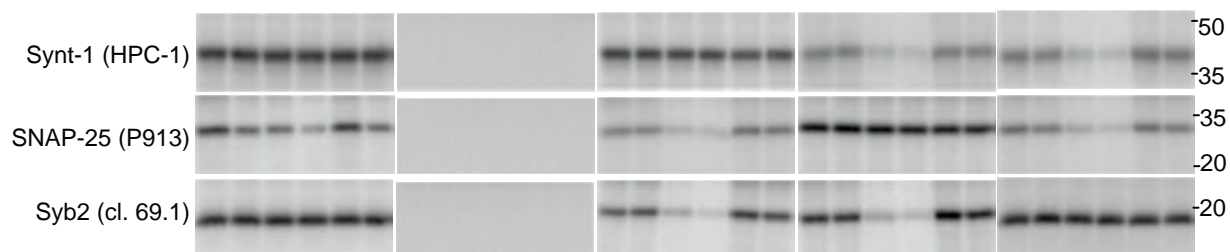**Figure 1**

Source scans of key Western blot data. In many experiments, membranes were cut prior to probing each strip with a separate antibody. In these cases, the area between two molecular mass markers, at least one above and one below the band is shown (unless the signal is below the lowest marker). Antibody used is indicated in parentheses.
